# Supplementary material for: Rediscover and Refine QTLs for Pig Scrotal Hernia by Increasing a Specially Designed F3 Population and Using Whole-Genome Sequence Imputation Technology
Source: Front Genet. 2019 Sep 23;10:890. doi: 10.3389/fgene.2019.00890 (PMC6768097; doi:10.3389/fgene.2019.00890)
Supplement: Supplementary file 1 [file DataSheet_1.pdf]

## SUPPLEMENTARY MATERIAL:

### Title: Rediscover and Refine QTLs for Pig Scrotal Hernia by Increasing a Specially Designed F<sub>3</sub> Population and Using Whole Genome Sequence Imputation Technology

Wenwu Xu, Dong Chen, Guorong Yan, Shijun Xiao, Tao Huang, Zhiyan Zhang<sup>†</sup> and lusheng Huang<sup>†</sup>

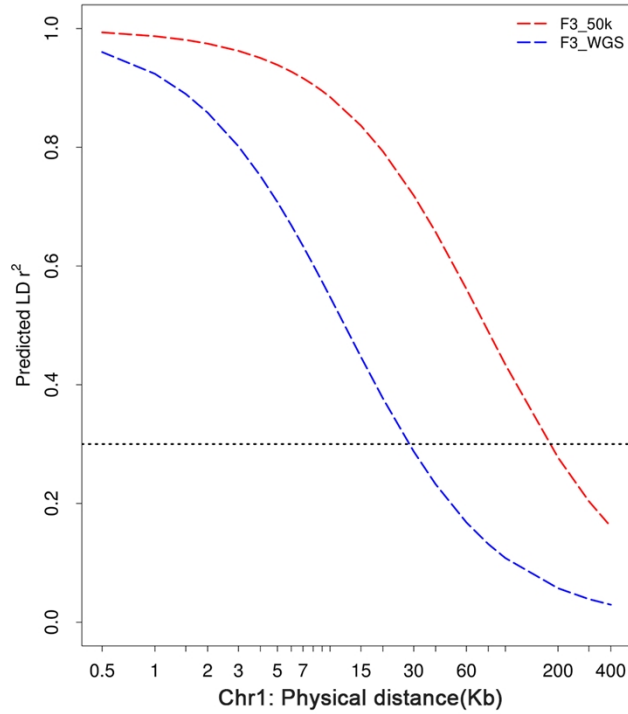

**Figure S1 Linkage disequilibrium (LD) decay for F3 individuals in chromosome 1.** LD decay was calculated for F3 using 50K genotype (*red line*) and whole-genome imputed data (*blue line*). X-axis indicates the physical distance (kb) between two markers, and if distances between two markers is greater than 400kb, the LD will not be calculated. Y-axis indicates the predicted LD by non-linear fit.

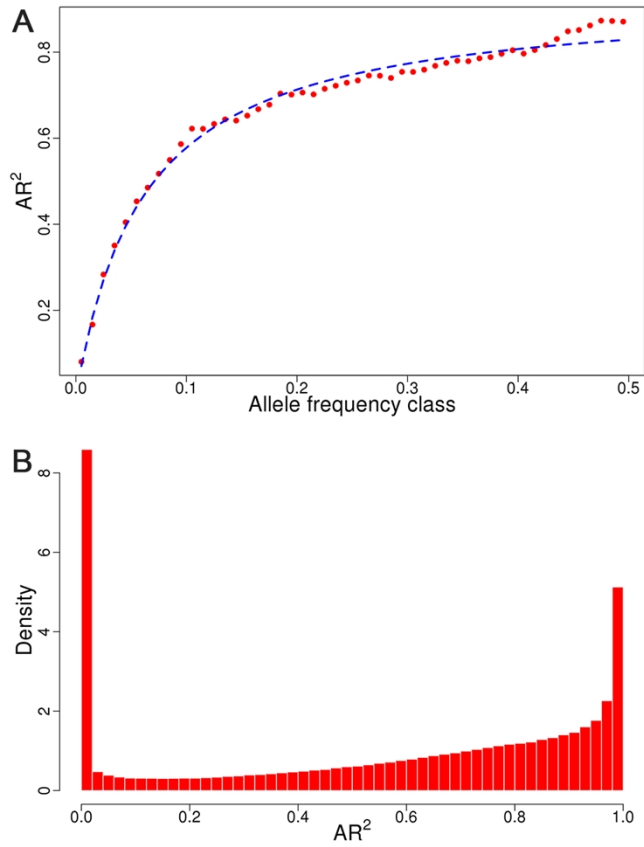

**Figure S2 imputation accuracy.** (A) The squared correlation between sequenced and imputed individuals, the x-axis is the MAF range from 0 to 0.5, and the y-axis is imputation accuracy denoted by the  $AR^2$ . And the blue line indicates the predicted  $AR^2$  by non-linear fit. (B) the histogram of  $AR^2$ .

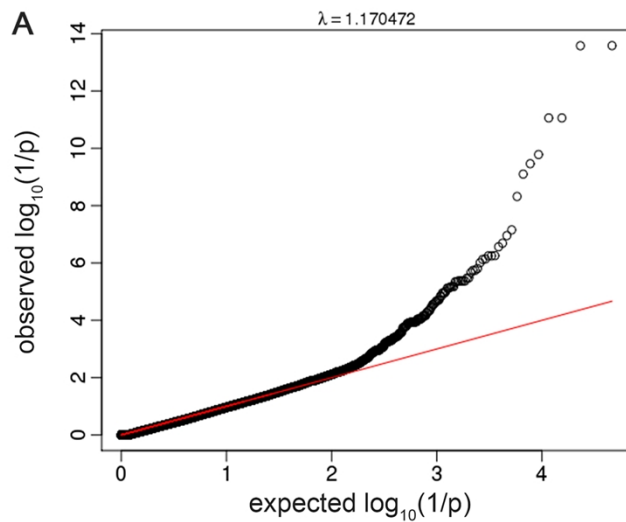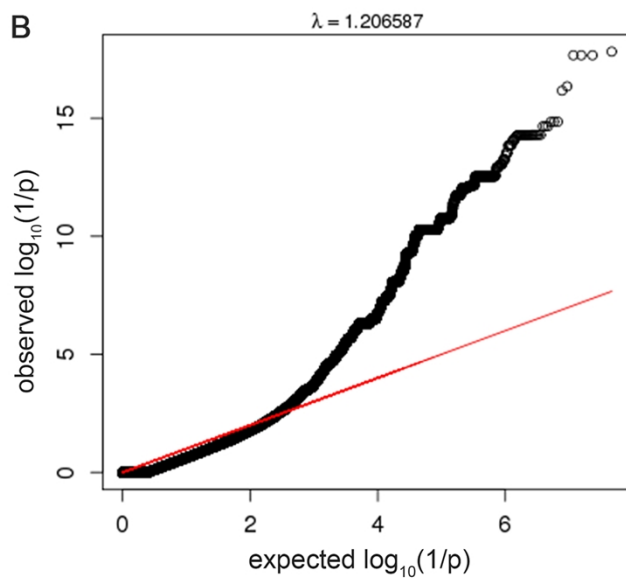

**Figure S3 Quantile-quantile (Q-Q) plots for influence of population stratification on GWAS.** The y-axis and x-axis represent the expected and observed negative  $\log_{10} P$ -value, respectively.

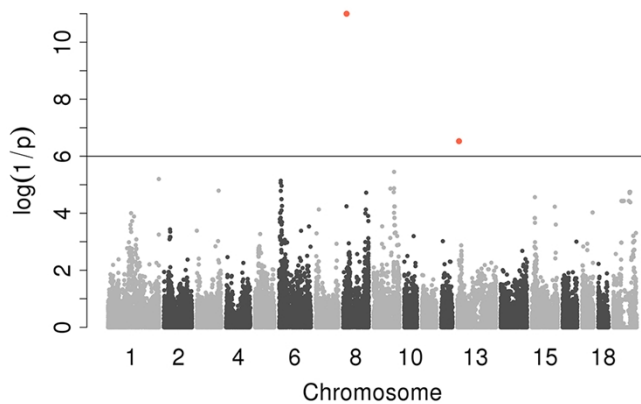

**Figure S4 Manhattan plot of conditional GWAS for F<sub>3</sub> populations.** Log(1/p) of SNPs were plotted against their genomic position, the solid line indicates the 5% genome-wide significant threshold. SNPs surpassing the genome-wide threshold are highlighted in pink.

**Table S1** Haplotypes of the region between flanked by markers rs341392224 and rs326688253 on chromosome 8 are shown (quantity greater than 10), and the chi-square result of it.

| <b>Haplotype</b> | <b>case</b> | <b>control</b> | <b><i>P</i>-value</b> |
|------------------|-------------|----------------|-----------------------|
| CACGT            | 12          | 17             | 1.02E-12              |
| CATAC            | 4           | 76             | 0.35                  |
| CATAT            | 1           | 144            | 2E-4                  |
| CGTGC            | 2           | 31             | 0.74                  |
| TGCAC            | 11          | 35             | 9.5E-06               |
| TGTAC            | 6           | 150            | 0.035                 |
